# Supplementary material for: Expression and Functional Characterization of c-Fos Gene in Chinese Fire-Bellied Newt Cynops orientalis
Source: MDPI journal article supplement (doi:10.3390/genes12020205), 2021-01-30
Supplement: s1 [file s1]

**Table S2.** c-Fos amino acid sequence identity comparison with other species.

| <b>GenBank number</b> | <b>Speieces</b>                | <b>Identity</b> |
|-----------------------|--------------------------------|-----------------|
| MG604921.1            | <i>Cynops orientalis</i>       | 100%            |
| N/A *                 | <i>Ambystoma mexicanum</i>     | 82%             |
| XP_018429844.1        | <i>Nanorana parkeri</i>        | 62%             |
| NP_001016200.1        | <i>Xenopus tropicalis</i>      | 60%             |
| XP_015276116.1        | <i>Gekko japonicus</i>         | 58%             |
| ELV09902.1            | <i>Tupaia chinensis</i>        | 57%             |
| XP_007425512.1        | <i>Python bivittatus</i>       | 57%             |
| XP_013917032.1        | <i>Thamnophis sirtalis</i>     | 57%             |
| XP_005148951.1        | <i>Melopsittacus undulatus</i> | 56%             |
| NP_005243.1           | <i>Homo sapiens</i>            | 54%             |
| NP_034364.1           | <i>Mus musculus</i>            | 54%             |
| NP_001159654.1        | <i>Ovis aries</i>              | 54%             |
| ELR52625.1            | <i>Bos mutus</i>               | 53%             |
| XP_010862512.2        | <i>Esox lucius</i>             | 52%             |
| NP_990839.1           | <i>Gallus gallus</i>           | 50%             |

\* The sequence of the axolotl c-Fos homolog (AMEX60DD301011151.1) can be found in the AXOLOTL-OMICS database (<https://www.axolotl-omics.org/>).
