# Supplementary material for: Expression and Functional Characterization of c-Fos Gene in Chinese Fire-Bellied Newt Cynops orientalis
Source: MDPI journal article supplement (doi:10.3390/genes12020205), 2021-01-30
Supplement: s1 [file s1]

**Table S1.** PCR primers used in this study.

| Primer            | Sequence (5'-3')        | Length (bp) | Purpose           |
|-------------------|-------------------------|-------------|-------------------|
| Co-c-Fos_F        | GATTTCTGCACTGAGGA       | 1602        | PCR amplification |
| Co-c-Fos_R        | ACACACACAAGAGAAGGCC     |             |                   |
| Co-c-Fos_qF       | TCTGTCGTAGTGGACATGGA    | 93          | qRT-PCR           |
| Co-c-Fos_qR       | GTAGGTGAAGACGAAGGAAGATG |             |                   |
| Co-MMP-3_qF       | GATGTTGATGGCATTCAAGCC   | 144         | qRT-PCR           |
| Co-MMP-3_qR       | AGTTGGGTCACAGATGGATGG   |             |                   |
| $\beta$ -actin_qF | CCGGATCATGTTTGAGACCTT   | 111         | qRT-PCR           |
| $\beta$ -actin_qR | TCACCGGAATCCATCACAATAC  |             |                   |
